# Supplementary material for: A porphyrin-based metal–organic framework with highly efficient adsorption and photocatalytic degradation performances for organic dyes
Source: Royal Society of Chemistry journal article supplement (doi:10.1039/d2qi00091a), 2022-01-01
Supplement: d2qi00091a1.pdf [file d2qi00091a1.pdf]

Electronic Supplementary Information (ESI) for Inorganic Chemistry Frontiers.

# A porphyrin-based metal-organic framework with highly efficient adsorption and photocatalytic degradation of organic dyes

*Xiong-Hai Chen,<sup>a</sup> Yun-Shi Zhang,<sup>a</sup> Wen-Bin Li,<sup>a</sup> Xiu-Wen Guan,<sup>a</sup> Jia-Wen Ye,<sup>a</sup> Ling Chen,<sup>a</sup> Hai-Ping Wang,<sup>a</sup> Jie Bai,<sup>b</sup> Zong-Wen Mo,<sup>\*a</sup> and Xiao-Ming Chen<sup>a,c</sup>*

<sup>a</sup> School of Biotechnology and Health Sciences, Wuyi University, Jiangmen, Guangdong 529000, PR China.

<sup>b</sup> Analysis and Test Center, Guangdong University of Technology, Guangzhou 510275, China.

<sup>c</sup> MOE Key Laboratory of Bioinorganic and Synthetic Chemistry, School of Chemistry, Sun Yat-Sen University, Guangzhou 510275, China.

\*Email: [wyuchemmzw@126.com](mailto:wyuchemmzw@126.com)

### Calculation of capacity.

The adsorption capacities at a given time and equilibrium are calculated as equation: (1)

$$Q_e = V \cdot (C_0 - C_e) \cdot M/m \quad (1)$$

where  $V$  is the volume of the dye solution,  $C_0$ , and  $C_e$  represent the concentration of dye solution at the initial and equilibrium time, respectively.  $m$  is the adsorbent mass of 1.

### Photocatalytic degradation of dyes of kinetics.

Dynamic analysis of the catalysis of dyes shows that the degradation of the dye is a first-order reaction, and the first-order model is expressed by equation (2, Langmuir–Hinshelwood model). The kinetic constant ( $k$ ) reflects the speed of photodegradation.

$-\ln(C/C_0) = k \cdot t$  (2) The  $k$  value is the kinetic constant, and the slope of the linear plot.

### Calculation of degradation efficiency.

The degradation efficiency of dyes is calculated using the following equation (3)

$$\text{Degradation efficiency (\%)} = (1 - C/C_0) \cdot 100\% \quad (3)$$

$C$  and  $C_0$  represent the apparent and initial concentrations of dyes, respectively.

### Adsorption kinetics study.

The pseudo-second/first-order model was used to fit the kinetic results. The related equation can be expressed as follows:

$$t / Q_t = 1 / (k_1 Q_e^2) + t / Q_e$$

$$\ln(Q_e - Q_t) = \ln Q_e - k_2 t$$

$k_1$  ( $\text{g} \cdot \text{mg}^{-1} \cdot \text{min}^{-1}$ ) is the rate constant of adsorption, which was calculated from the intercept/slope of  $t / Q_t$  vs  $t$  plot and  $k_2$  ( $\text{min}^{-1}$ ) was obtained from the slope of  $\ln(Q_e - Q_t)$  vs  $t$  plot.

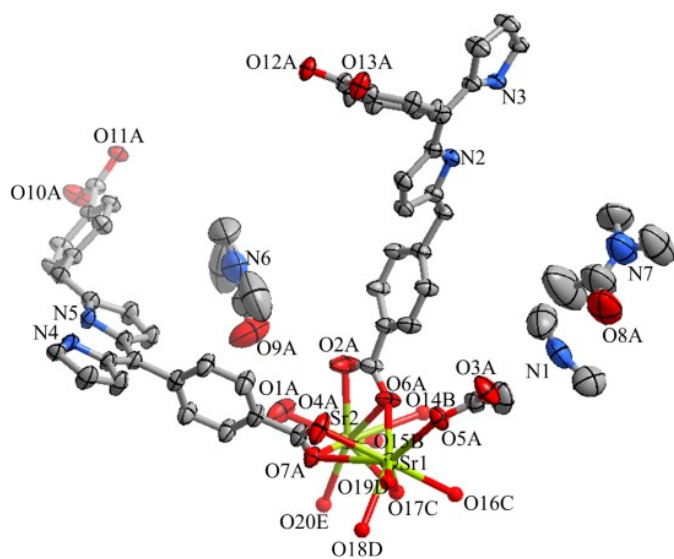

**Fig. S1.** Perspective view of the asymmetric unit of **1** (symmetry codes: A =  $2-x, 2-y, 1-z$ ; B =  $3-x, 2-y, 1-z$ ; C =  $5/2+x, 5/2-y, 1/2+z$ ; D =  $-1/2x, 5/2-y, 1/2+z$ ; E =  $1/2+x, 5/2-y, 1/2+z$ ).

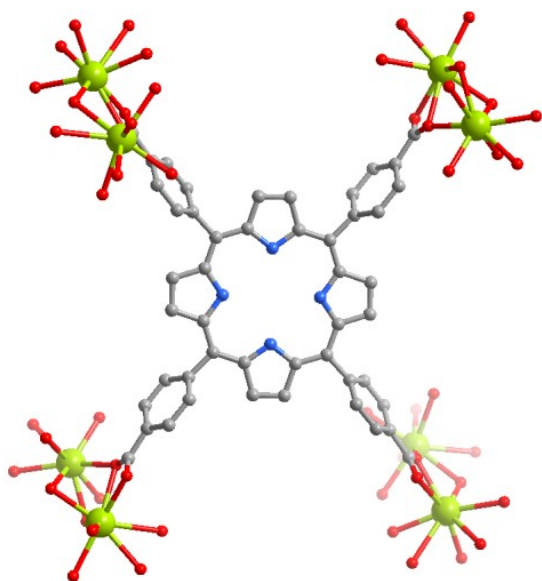

**Fig. S2.** The coordination mode of TCPP<sup>4+</sup> ligand in **1**.

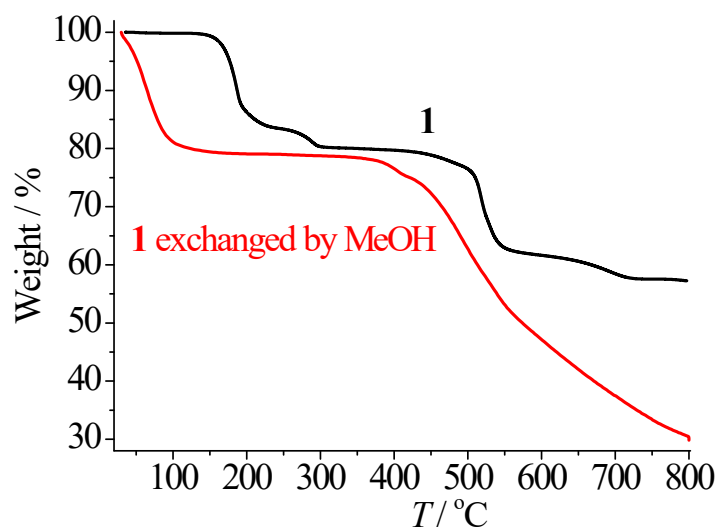

**Fig. S3.** The thermogravimetry curves of **1** and MeOH-exchanged **1**.

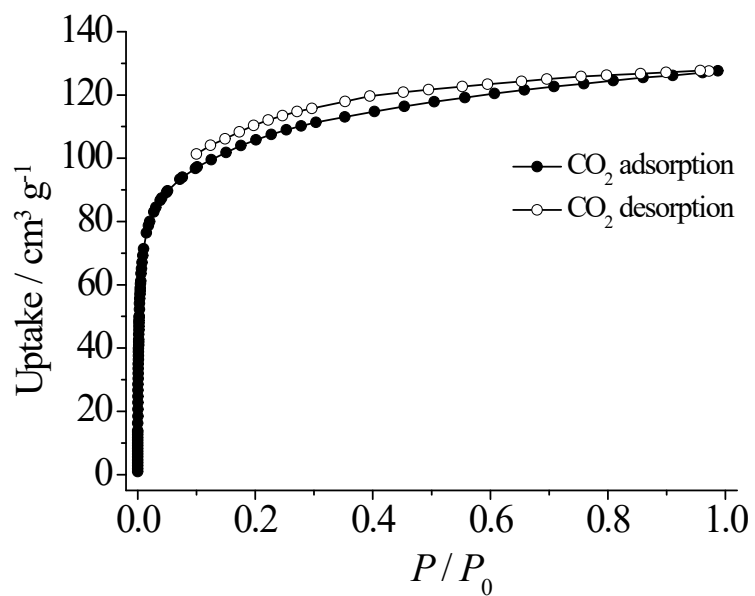

**Fig. S4.** CO<sub>2</sub> sorption isotherms for **1** at 195 K.

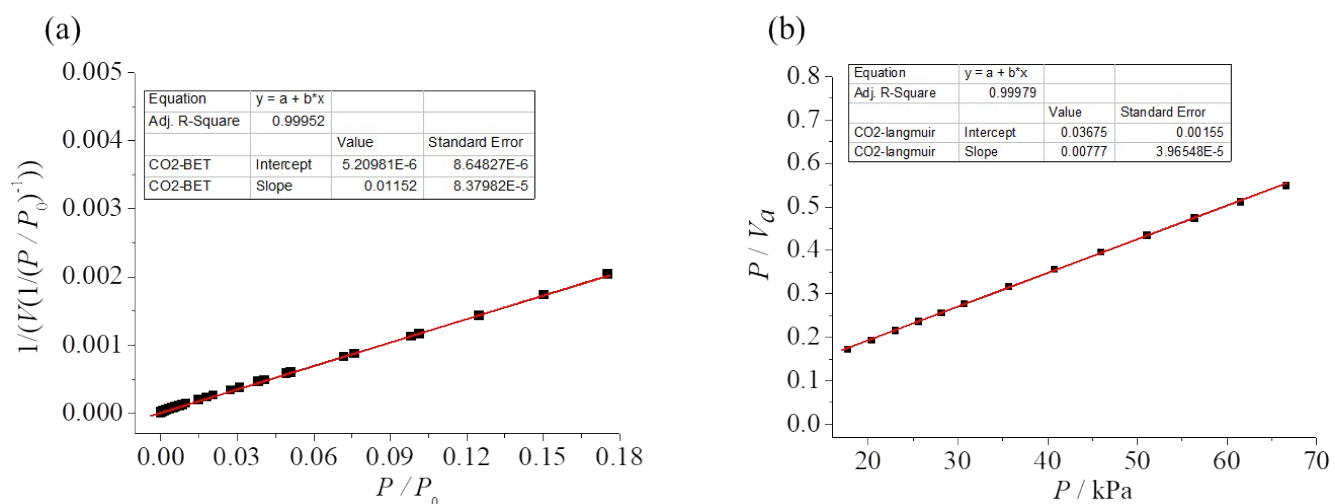

**Fig. S5.** (a) BET and (b) Langmuir fittings of the CO<sub>2</sub> adsorption isotherm for **1**.

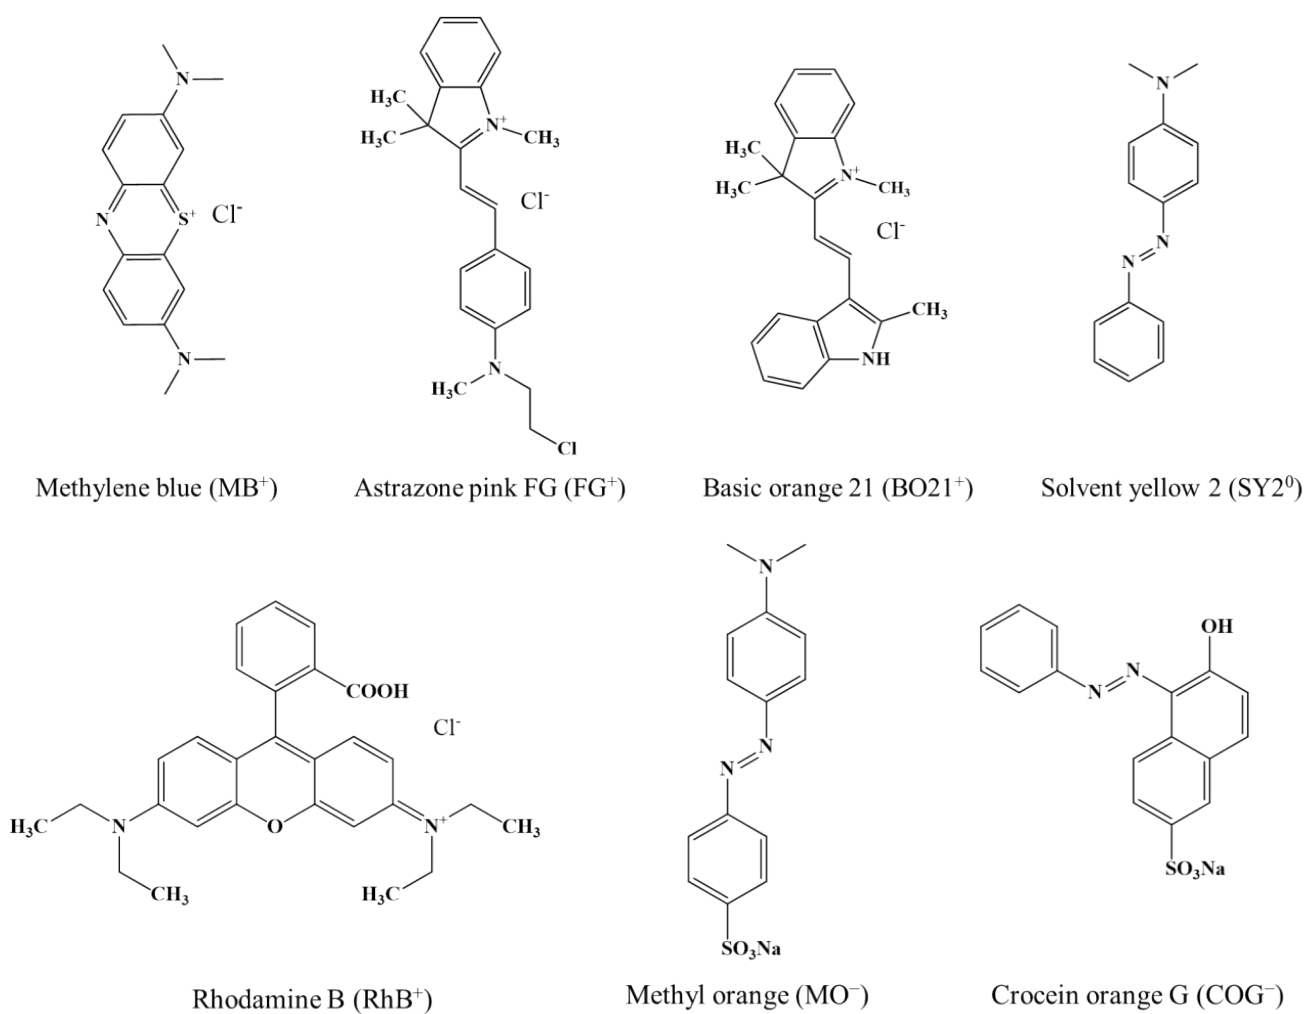

**Fig. S6.** Structures of the dye molecules.

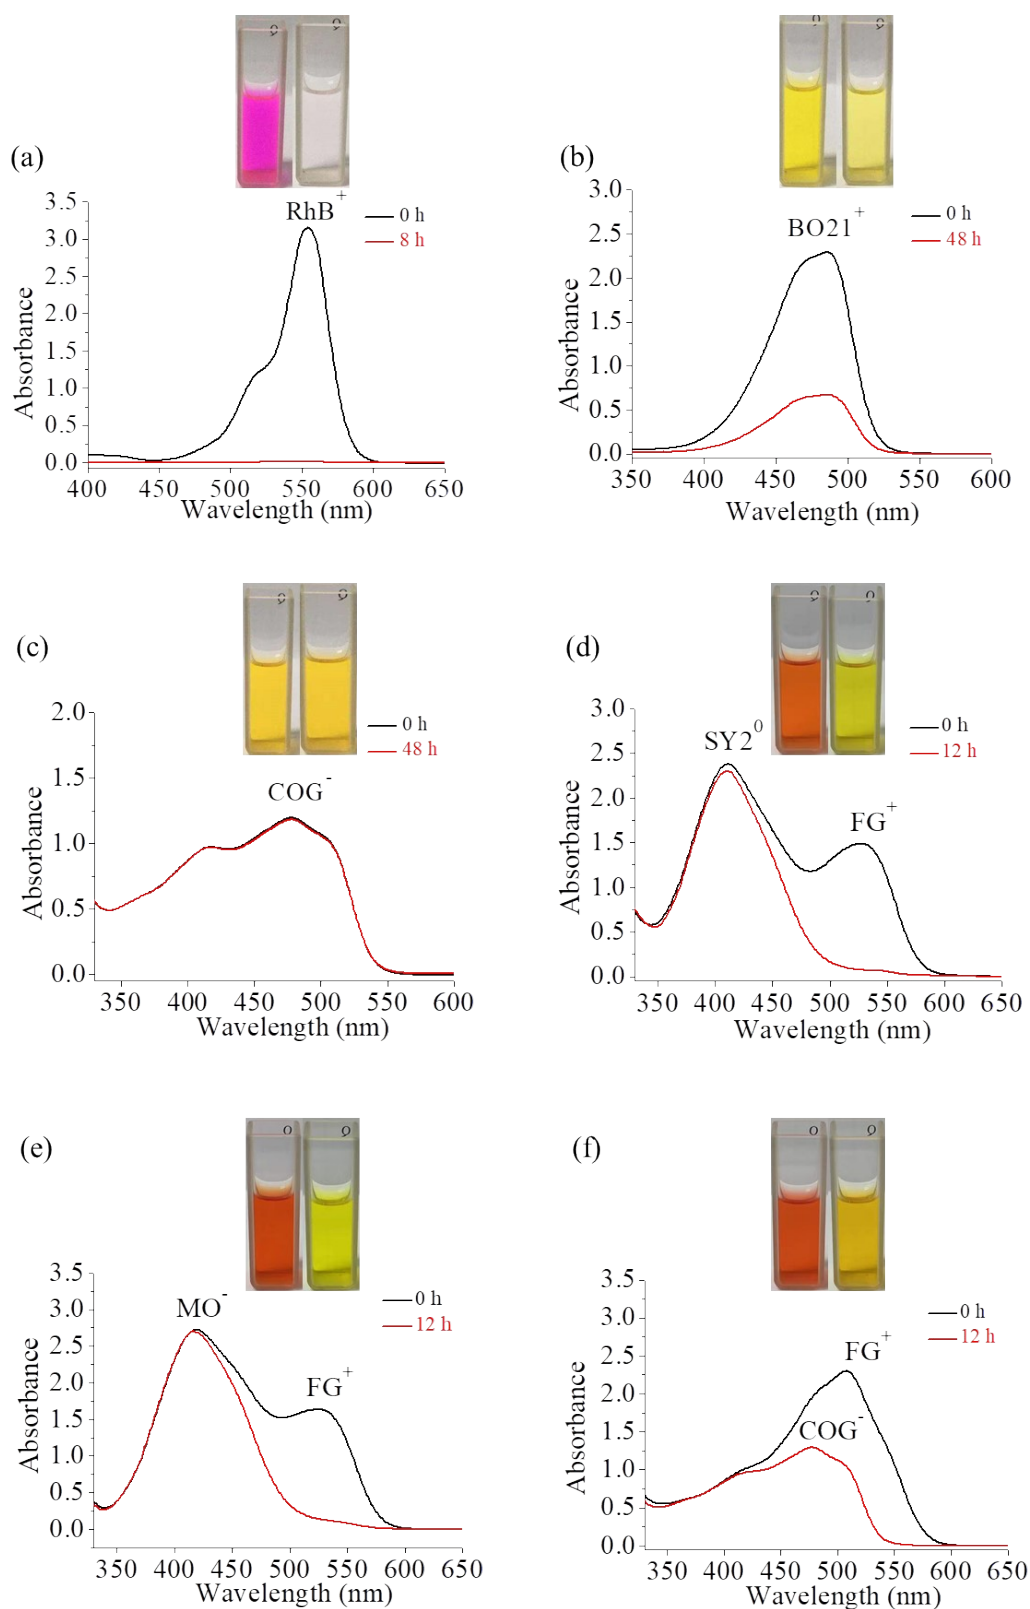

**Fig. S7.** UV-vis absorbance of (a) RhB<sup>+</sup> (0.25 mmol L<sup>-1</sup>), (b) BO21<sup>+</sup> (0.1 mmol L<sup>-1</sup>), and (c) COG<sup>-</sup> (0.1 mmol L<sup>-1</sup>). Two-component dye adsorption of (d) SY2<sup>0</sup> and FG<sup>+</sup>, (e) MO<sup>-</sup> and FG<sup>+</sup> and (f) COG<sup>-</sup> and FG<sup>+</sup> (0.1 mmol L<sup>-1</sup> and 0.1 mmol L<sup>-1</sup>). Inset: photographs showing visual colour changes of the dye solution.

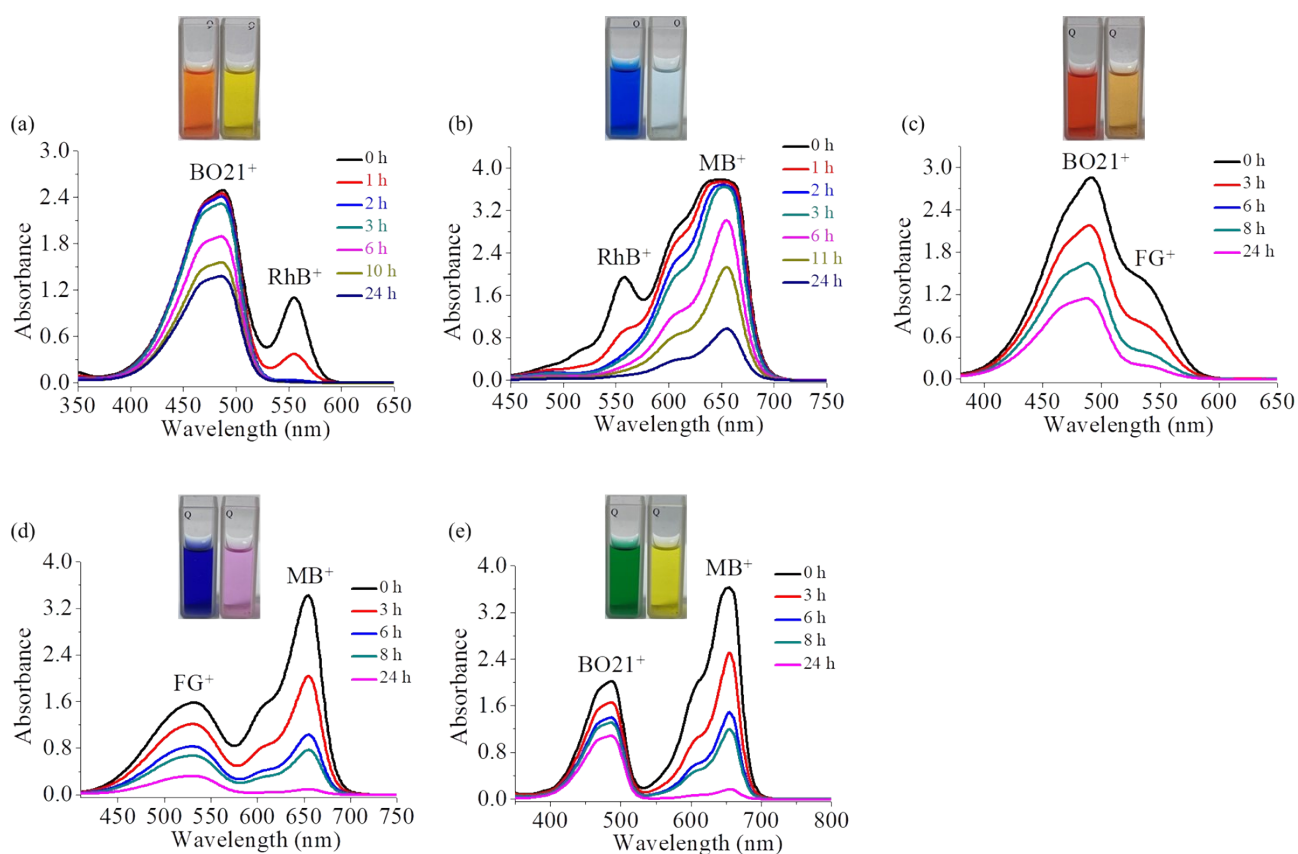

**Fig. S8.** Two-component dye adsorption of (a) RhB<sup>+</sup> and BO21<sup>+</sup>, (b) RhB<sup>+</sup> and MB<sup>+</sup>, (c) FG<sup>+</sup> and BO21<sup>+</sup>, (d) FG<sup>+</sup> and MB<sup>+</sup> and (e) BO21<sup>+</sup> and MB<sup>+</sup> (0.1 mmol L<sup>-1</sup> and 0.1 mmol L<sup>-1</sup>).

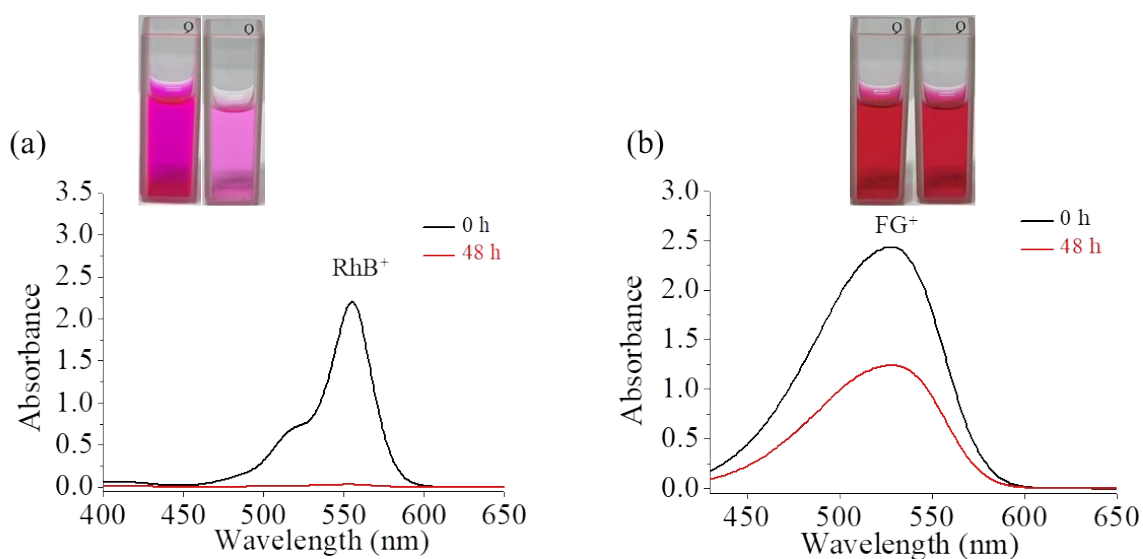

**Fig. S9.** UV-vis absorption spectra for dye adsorption with high concentration of (a) RhB<sup>+</sup> (1 mmol L<sup>-1</sup>) and (b) FG<sup>+</sup> (0.6 mmol L<sup>-1</sup>). Inset: photographs showing visual colour changes of the dye solution before and after adsorption experiment.

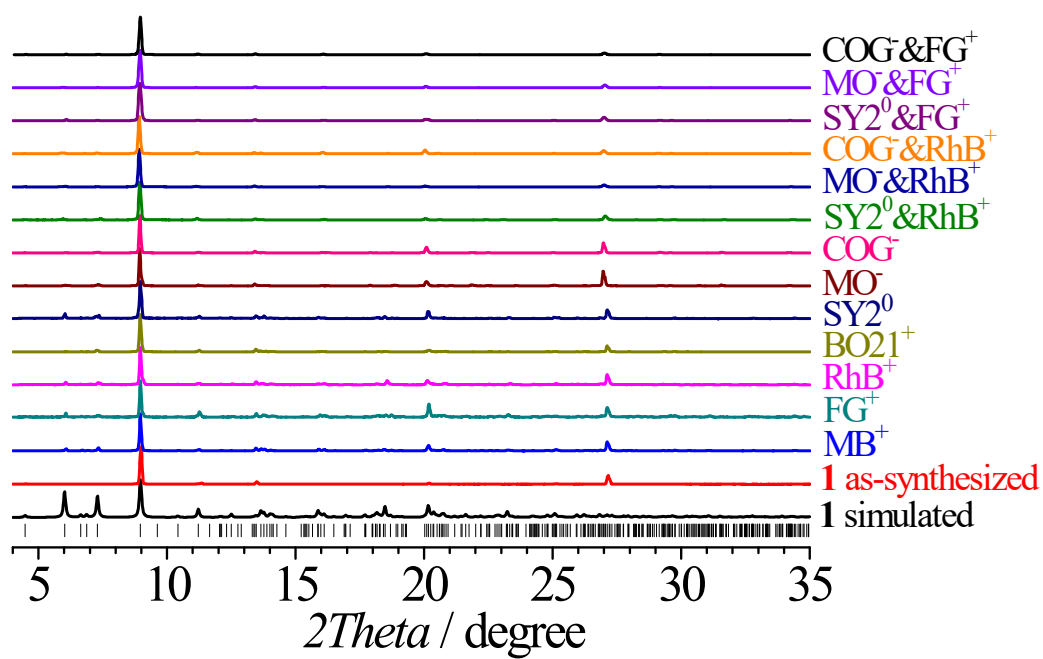

Fig. S10. PXRD patterns of **1** after dye exchange experiments.



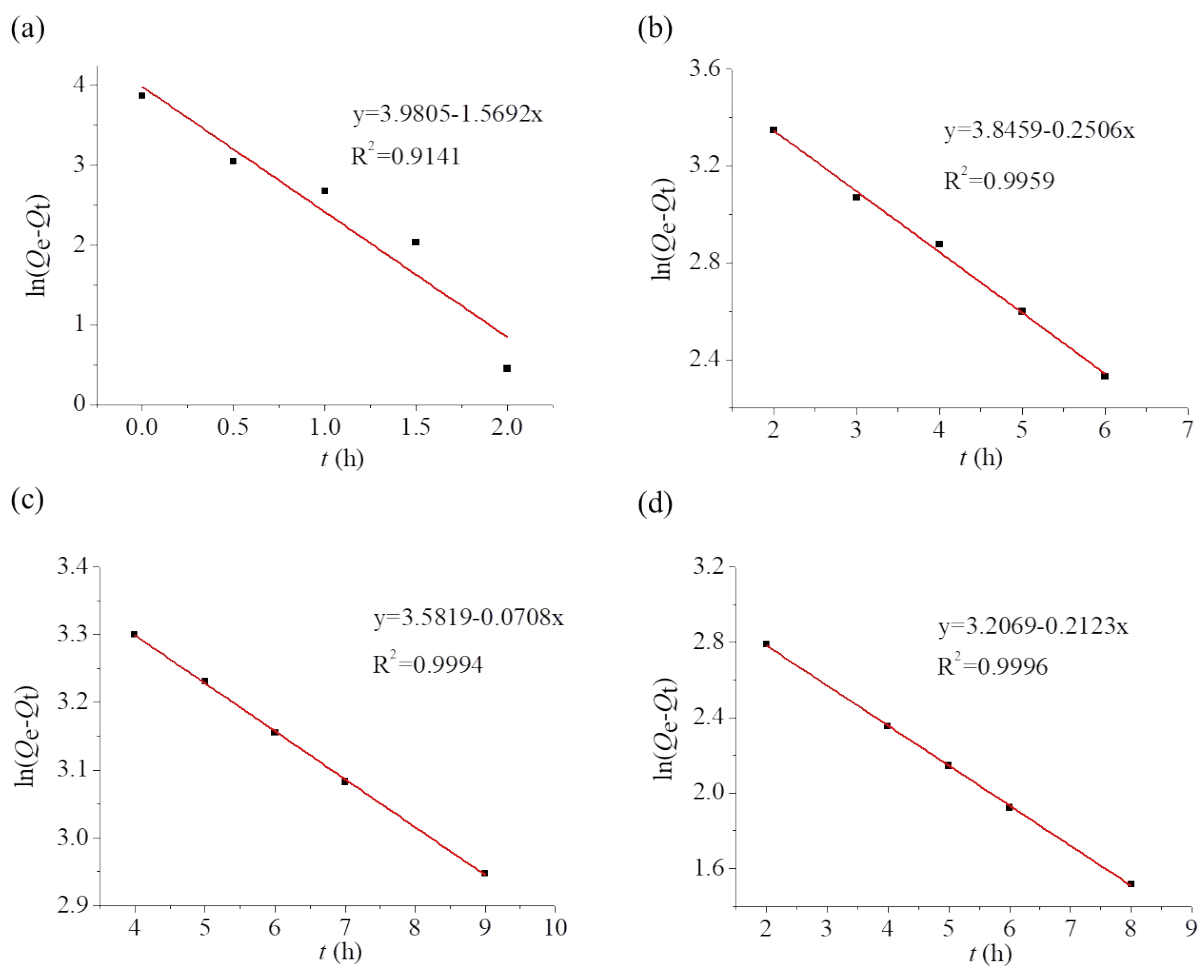

**Figure S11.** Plot of the pseudo-first-order kinetic model for (a) RhB<sup>+</sup>, (b) FG<sup>+</sup>, (c) BO21<sup>+</sup> and (d) MB<sup>+</sup>.

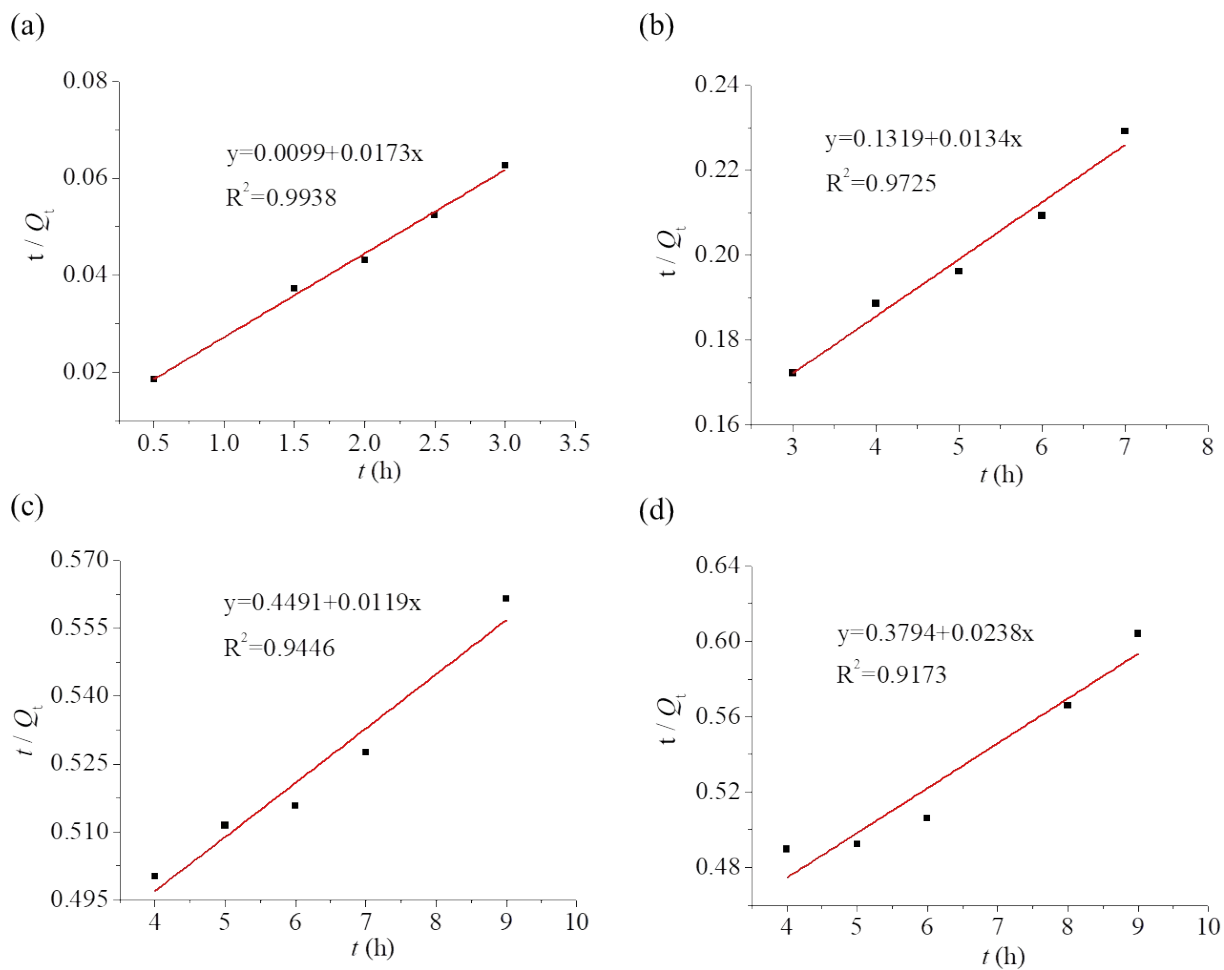

**Figure S12.** Plot of the pseudo-second-order kinetic model for (a) RhB<sup>+</sup>, (b) FG<sup>+</sup>, (c) BO21<sup>+</sup> and (d) MB<sup>+</sup>.

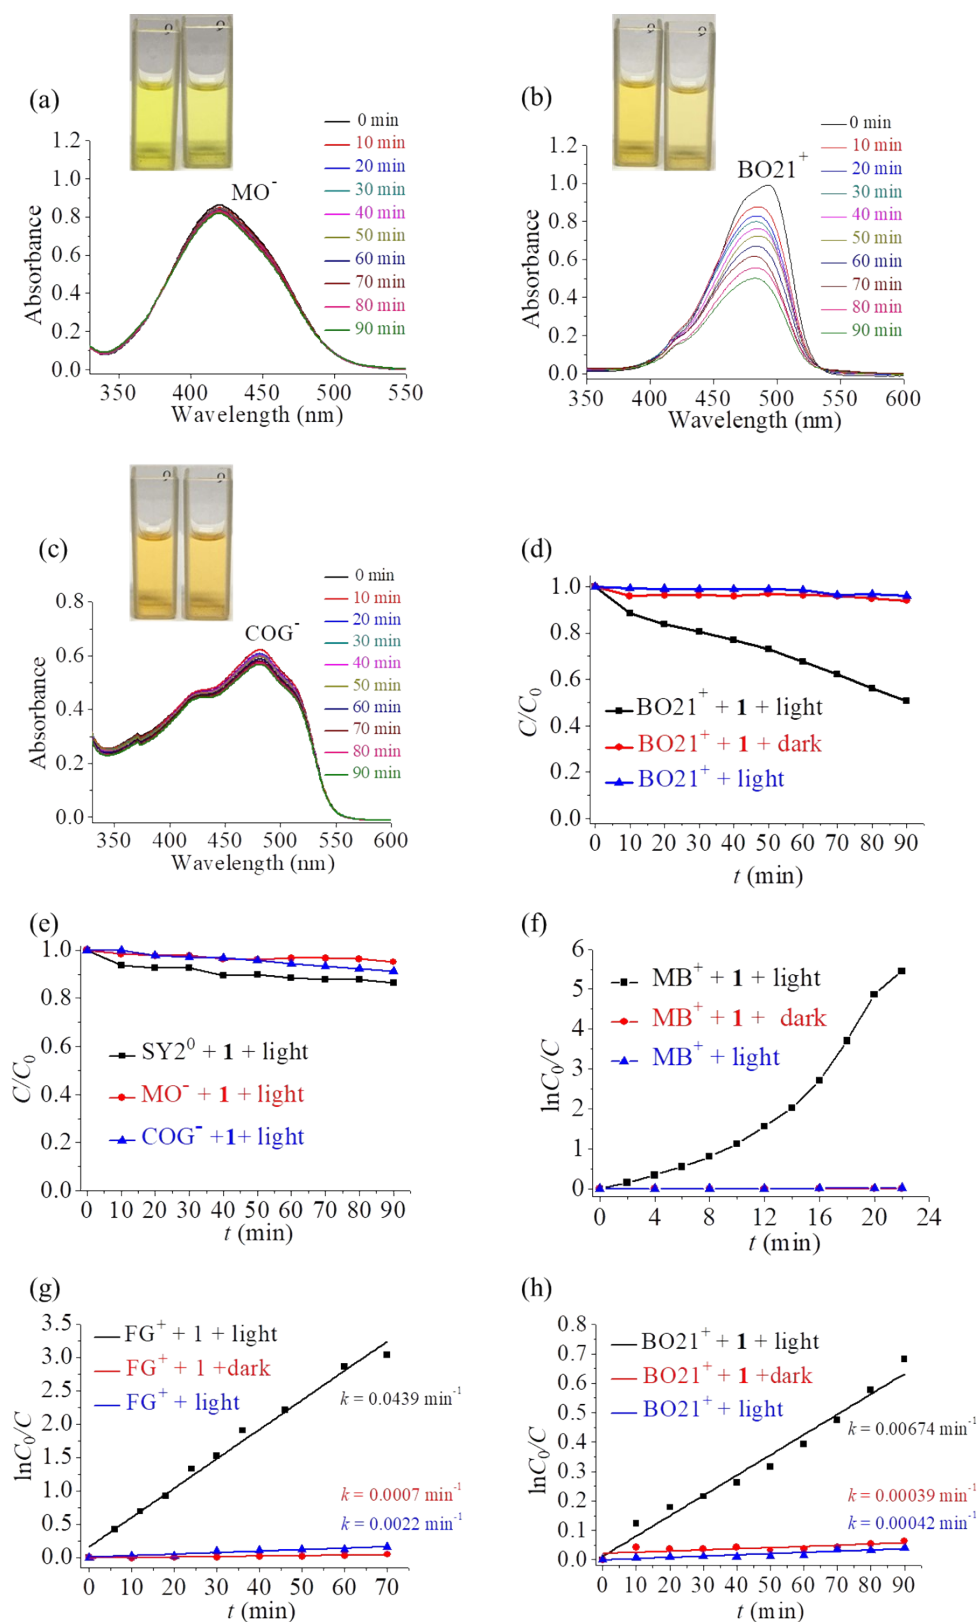

**Fig. S13.** UV-vis absorption spectra of (a)  $\text{BO}_{21}^+$ , (b)  $\text{MO}^-$  and (c)  $\text{COG}^-$  recorded at various times during the photocatalytic process, photocatalytic oxidation performances of **1** for (d)  $\text{BO}_{21}^+$ , (e)  $\text{SY}2^0$ ,  $\text{MO}^-$  and  $\text{COG}^-$ . Plots of  $\ln(C_0/C)$  with respect to time for (f)  $\text{MB}^+$ , (g)  $\text{FG}^+$ , and (h)  $\text{BO}_{21}^+$ , providing apparent reaction rate constants ( $k$ ).

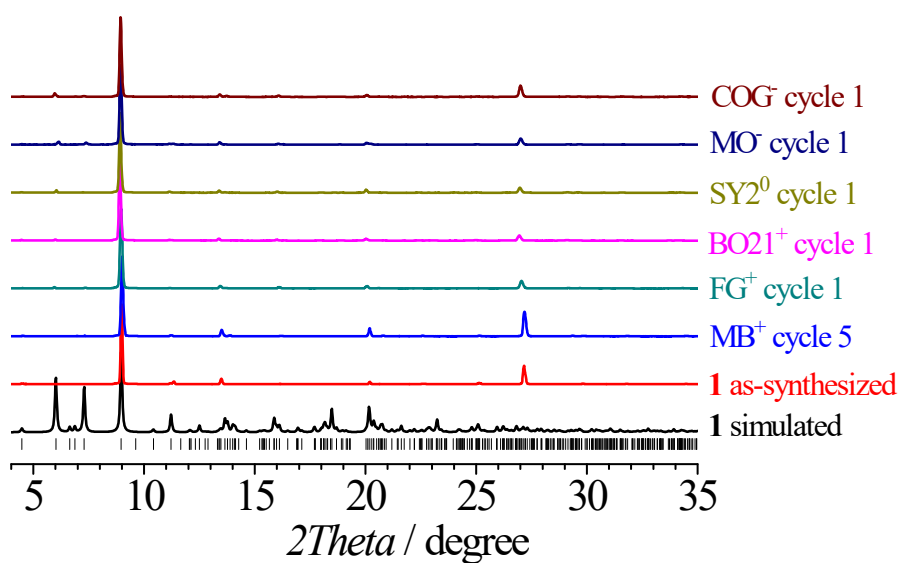

**Fig. S14.** PXRD patterns of **1** after photocatalytic experiments.

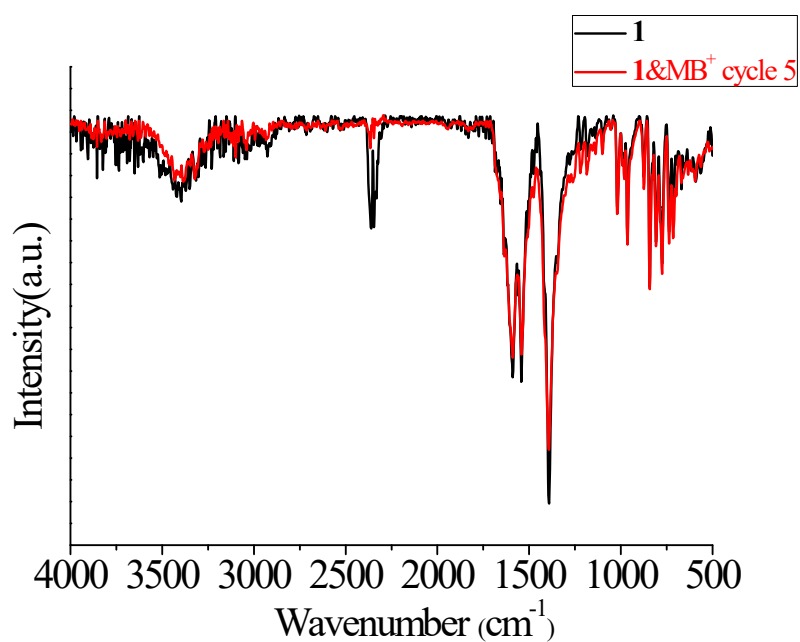

**Fig. S15.** Infrared spectra of **1** before and after photocatalytic experiments of five consecutive photocatalytic recycles for the degradation of  $\text{MB}^+$ .

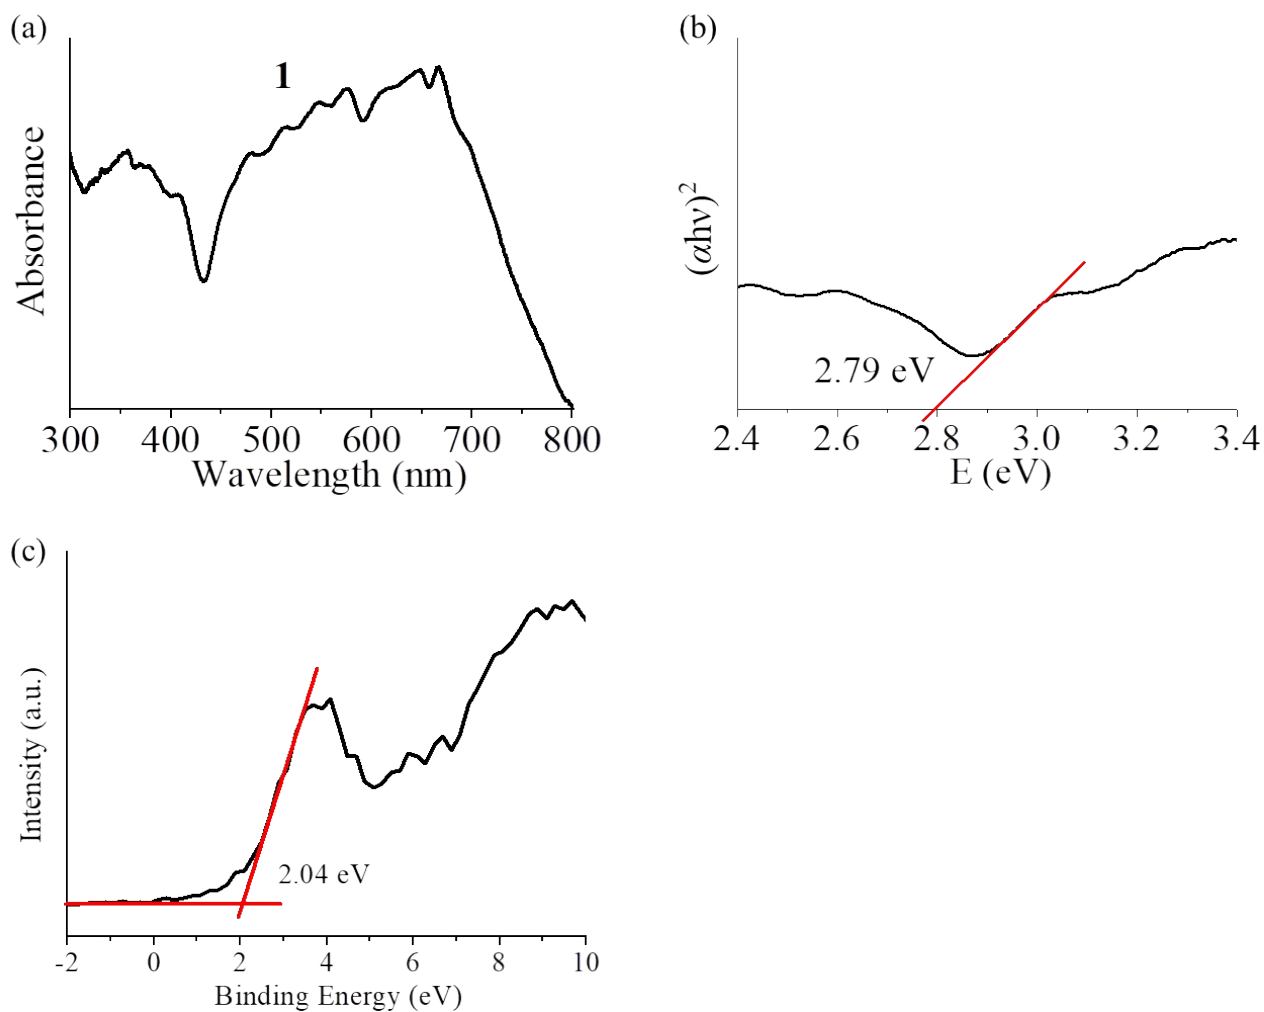

**Fig. S16.** (a) UV-vis diffuse reflectance spectrum (DRS) spectrum of **1**, (b) Tauc plot of the UV-vis DRS spectrum of **1** and (c) VB XPS diagram of **1**.

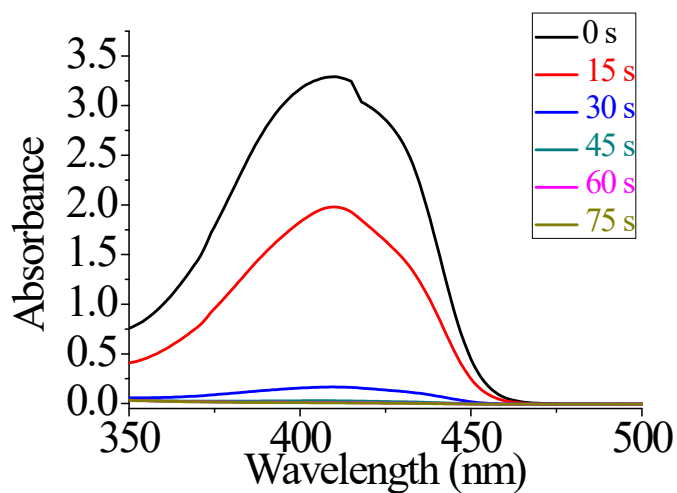

**Fig. S17.** Time evolution of the absorption spectra of DPBF under visible light irradiation.

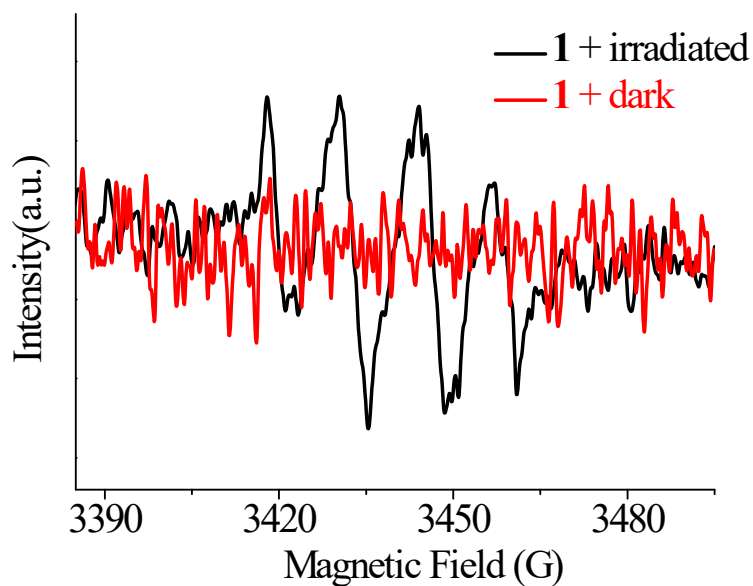

**Fig. S18.** DMPO/ $\cdot\text{O}_2^-$  spin-trapping ESR spectra of **1** in methanol before and after irradiation.

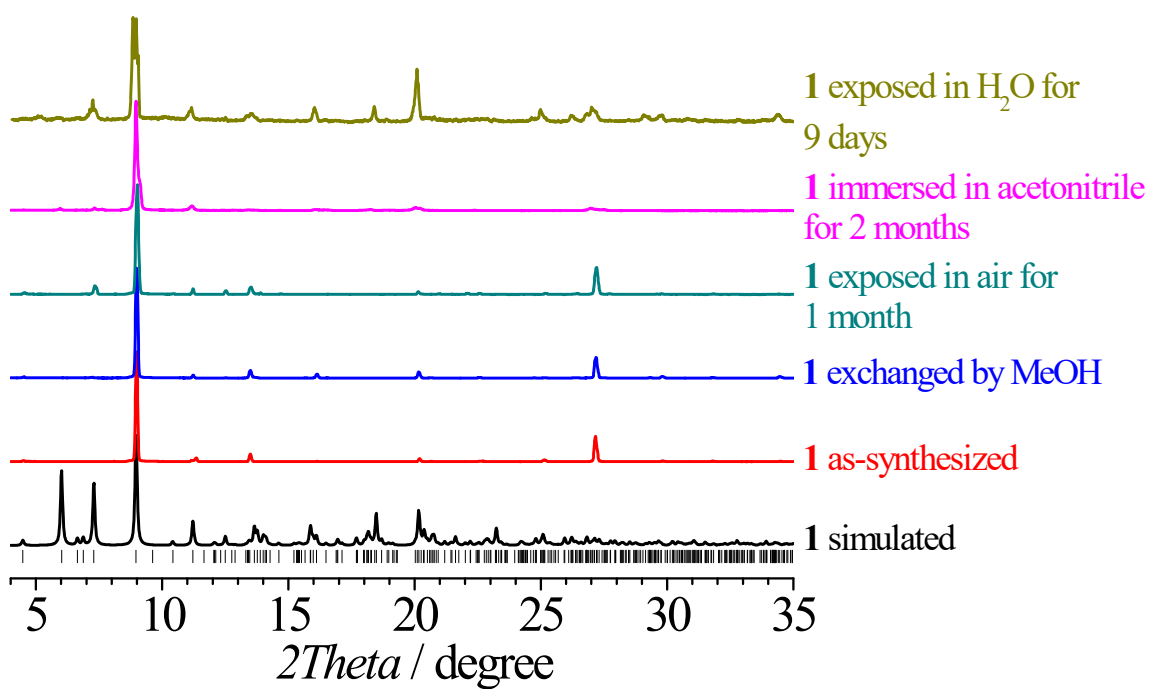

**Fig. S19.** PXRD patterns of **1** under different environments.

**Table S1.** Crystallographic data and structural refinement detail of **1**.

| <b>Complex</b>                                                   | <b>1</b>                                                                       |
|------------------------------------------------------------------|--------------------------------------------------------------------------------|
| Formula                                                          | C <sub>60</sub> H <sub>57</sub> N <sub>7</sub> O <sub>13</sub> Sr <sub>2</sub> |
| Formula weight                                                   | 1259.36                                                                        |
| Temperature (K)                                                  | 298(2)                                                                         |
| Crystal system                                                   | monoclinic                                                                     |
| Space group                                                      | <i>P2<sub>1</sub>/n</i>                                                        |
| <i>a</i> /Å                                                      | 7.67080(4)                                                                     |
| <i>b</i> /Å                                                      | 26.58541(16)                                                                   |
| <i>c</i> /Å                                                      | 29.55061(17)                                                                   |
| <i>β</i> /°                                                      | 96.5378(5)                                                                     |
| <i>V</i> /Å <sup>3</sup>                                         | 5987.11(6)                                                                     |
| <i>Z</i>                                                         | 4                                                                              |
| <i>D<sub>c</sub></i> /g cm <sup>-3</sup>                         | 1.397                                                                          |
| reflns coll.                                                     | 11011                                                                          |
| unique reflns                                                    | 12013                                                                          |
| <i>R</i> <sub>int</sub>                                          | 0.0423                                                                         |
| <i>R</i> <sub>1</sub> [ <i>I</i> > 2σ( <i>I</i> )] <sup>a</sup>  | 0.0386                                                                         |
| <i>wR</i> <sub>2</sub> [ <i>I</i> > 2σ( <i>I</i> )] <sup>b</sup> | 0.1052                                                                         |
| <i>R</i> <sub>1</sub> (all data)                                 | 0.0414                                                                         |
| <i>wR</i> <sub>2</sub> (all data)                                | 0.1073                                                                         |
| GOF                                                              | 1.028                                                                          |

---

$${}^a R_1 = \frac{\sum ||F_o| - |F_c||}{\sum |F_o|}$$

$${}^b wR_2 = \left\{ \frac{\sum w[(F_o)^2 - (F_c)^2]^2}{\sum w[(F_o)^2]^2} \right\}^{1/2}$$

**Table S2.** Comparison of RhB<sup>+</sup> adsorption capacities in MOFs.

| Dyes             | MOFs                     | $Q_e$ (mg/g) | Ref              |
|------------------|--------------------------|--------------|------------------|
| RhB <sup>+</sup> | LIFM-WZ-3                | 141.5        | 1                |
|                  | LIFM-WZ-4                | 61.8         | 2                |
|                  | UPC-102-Zr               | 195          | 3                |
|                  | NH <sub>2</sub> -MOF-199 | 156          | 4                |
|                  | JUL-liu 397              | 16           | 5                |
|                  | MIL-100(Fe)              | 194.17       | 6                |
|                  | SCNU-Z2                  | 751.8        | 7                |
|                  | CP1                      | 24.36        | 8                |
|                  | MOF-808(Zr)              | 166.7        | 9                |
|                  | CPM-97-Fe                | 306          | 10               |
|                  | <b>1</b>                 | <b>472.8</b> | <b>This work</b> |



**Table S3.** Comparison of the photocatalytic degradation performances of MOFs on methylene blue (MB<sup>+</sup>).

| MOFs                                                                   | Dye                                                 | Concentration and quantity (mg L <sup>-1</sup> ) | Irradiation        | Degradation Time (min) | Degradation Efficiency (%) | Ref              |
|------------------------------------------------------------------------|-----------------------------------------------------|--------------------------------------------------|--------------------|------------------------|----------------------------|------------------|
| [Co <sub>2</sub> (tkcomm)(tkiymm)]                                     | MB <sup>+</sup>                                     | 3.51                                             | Vis (500 W)        | 300                    | 50                         | 11               |
| MIL-53(Fe)                                                             | MB <sup>+</sup>                                     | 140                                              | Vis (500 W)        | 40                     | 20                         | 12               |
| Fe <sub>3</sub> O <sub>4</sub> @MIL-100(Fe)                            | MB <sup>+</sup>                                     | 40                                               | Vis (500 W)        | 20                     | 20                         | 13               |
| [Co <sub>2</sub> (1,4-bdc)(ncp) <sub>2</sub> ]                         | MB <sup>+</sup>                                     | 35.1                                             | UV (375 W)         | 300                    | 63                         | 14               |
| MIL-88A                                                                | MB <sup>+</sup>                                     | 32                                               | Vis (300 W)        | 20                     | 100                        | 15               |
| g-C <sub>3</sub> N <sub>4</sub> /NH <sub>2</sub> -MIL-88B(Fe)          | MB <sup>+</sup>                                     | 30                                               | Vis (500 W)        | 120                    | 30                         | 16               |
| Cu <sub>4</sub> I <sub>4</sub> [Cu(5-eatz) <sub>2</sub> ] <sub>2</sub> | MB <sup>+</sup>                                     | 55                                               | Vis (300 W)        | 300                    | 50                         | 17               |
| Cu(I)(ptz)                                                             | MB <sup>+</sup><br>(H <sub>2</sub> O <sub>2</sub> ) | 18.7                                             | Vis (500 W)        | 24                     | 98                         | 18               |
| [Co(tib) <sub>2</sub> ] <sub>2</sub> ·SO <sub>4</sub>                  | MB <sup>+</sup>                                     | 10                                               | Vis (300 W)        | 25                     | 100                        | 19               |
| <b>1</b>                                                               | <b>MB<sup>+</sup></b>                               | <b>20</b>                                        | <b>Vis (300 W)</b> | <b>20</b>              | <b>99</b>                  | <b>This work</b> |

## References

1. Z. Wang, J. H. Zhang, J. J. Jiang, H. P. Wang, Z. W. Wei, X. J. Zhu, M. Pan and C. Y. Su, A stable metal cluster-metalloporphyrin MOF with high capacity for cationic dye removal, *J. Mater. Chem. A*, 2018, **6**, 17698-17705.
2. Z. Wang, C. Y. Zhu, H. S. Zhao, S. Y. Yin, S. J. Wang, J. H. Zhang, J. J. Jiang, M. Pan and C. Y. Su, Record high cationic dye separation performance for water sanitation using a neutral coordination framework, *J. Mater. Chem. A*, 2019, **7**, 4751-4758.
3. W. D. Fan, X. Wang, B. Xu, Y. T. Wang, D. D. Liu, M. Zhang, Y. Z. Shang, F. N. Dai, L. L. Zhang and D. F. Sun, Amino-functionalized MOFs with high physicochemical stability for efficient gas storage/separation, dye adsorption and catalytic performance, *J. Mater. Chem. A*, 2018, **6**, 24486-24495.
4. R. Issa, F. A. Ibrahim, M. Al-Ghoul and M. Hmadeh, Controlled growth and composition of multivariate metal-organic frameworks-199 via a reaction-diffusion process, *Nano Research*, 2021, **14**, 423-431.
5. Z. H. Xu, L. L. Han, G. L. Zhuang, J. Bai and D. Sun, In Situ Construction of Three Anion-Dependent Cu(I) Coordination Networks as Promising Heterogeneous Catalysts for Azide-Alkyne "Click" Reactions, *Inorg. Chem.*, 2015, **54**, 4737-4743.
6. J. Y. Wu, Y. Y. Gao, S. Wei, P. Chen, D. D. Gu, B. Fu and M. H. Chen, Plasma modification of Fe-MOF for efficient organic pollutants removal, *J. Solid State Chem.*, 2021, **302**, 9.
7. S. Q. Deng, Y. L. Miao, Y. L. Tan, H. N. Fang, Y. T. Li, X. J. Mo, S. L. Cai, J. Fan, W. G. Zhang and S. R. Zheng, An Anionic Nanotubular Metal-Organic Framework for High-Capacity Dye Adsorption and Dye Degradation in Darkness, *Inorg. Chem.*, 2019, **58**, 13979-13987.
8. Y. Rachuri, S. Subhagan, B. Parmar, K. K. Bisht and E. Suresh, Selective and reversible adsorption of cationic dyes by mixed ligand Zn(II) coordination polymers synthesized by reactant ratio modulation, *Dalton Trans.*, 2018, **47**, 898-908.
9. S. F. Jia, S. F. Song and X. D. Zhao, Selective adsorption and separation of dyes from aqueous solution by a zirconium-based porous framework material, *Appl. Organomet. Chem.*, 2021, **35**, 10.
10. S. H. Tian, S. Xu, J. T. Liu, C. He, Y. Xiong and P. Y. Feng, Highly efficient removal of both cationic and anionic dyes from wastewater with a water-stable and eco-friendly Fe-MOF via host-guest encapsulation, *J. Clean Prod.*, 2019, **239**, 10.
11. J. Guo, J. Yang, Y. Y. Liu and J. F. Ma, Two novel 3D metal-organic frameworks based on two tetrahedral ligands: syntheses, structures, photoluminescence and photocatalytic properties, *Crystengcomm*, 2012, **14**, 6609-6617.
12. J. J. Du, Y. P. Yuan, J. X. Sun, F. M. Peng, X. Jiang, L. G. Qiu, A. J. Xie, Y. H. Shen and J. F. Zhu, New photocatalysts based on MIL-53 metal-organic frameworks for the decolorization of methylene blue dye, *J. Hazard. Mater.*, 2011, **190**, 945-951.
13. C. F. Zhang, L. G. Qiu, F. Ke, Y. J. Zhu, Y. P. Yuan, G. S. Xu and X. Jiang, A novel magnetic recyclable photocatalyst based on a core-shell metal-organic framework Fe<sub>3</sub>O<sub>4</sub>@MIL-100(Fe) for the decolorization of methylene blue dye, *J. Mater. Chem. A*, 2013, **1**, 14329-14334.

14. H. Y. Sun, C. B. Liu, Y. Cong, M. H. Yu, H. Y. Bai and G. B. Che, New photocatalyst for the degradation of organic dyes based on  $[\text{Co}_2(1,4\text{-BDC})(\text{NCP})_2]_n \cdot 4n\text{H}_2\text{O}$ , *Inorg. Chem. Commun.*, 2013, **35**, 130-134.
15. W. T. Xu, L. Ma, F. Ke, F. M. Peng, G. S. Xu, Y. H. Shen, J. F. Zhu, L. G. Qiu and Y. P. Yuan, Metal-organic frameworks MIL-88A hexagonal microrods as a new photocatalyst for efficient decolorization of methylene blue dye, *Dalton Trans.*, 2014, **43**, 3792-3798.
16. X. Y. Li, Y. H. Pi, L. Q. Wu, Q. B. Xia, J. L. Wu, Z. Li and J. Xiao, Facilitation of the visible light-induced Fenton-like excitation of  $\text{H}_2\text{O}_2$  via heterojunction of g- $\text{C}_3\text{N}_4/\text{NH}_2$ -Iron terephthalate metal-organic framework for MB degradation, *Appl. Catal. B-Environ.*, 2017, **202**, 653-663.
17. J. Liu, Y. H. Tang, F. Wang and J. Zhang, Syntheses of copper-iodine cluster-based frameworks for photocatalytic degradation of methylene blue, *Crystengcomm*, 2018, **20**, 1232-1236.
18. T. Wen, D. X. Zhang and J. Zhang, Two-Dimensional Copper(I) Coordination Polymer Materials as Photocatalysts for the Degradation of Organic Dyes, *Inorg. Chem.*, 2013, **52**, 12-14.
19. Q. G. Shang, T. Y. Zeng, K. Gao, N. N. Liu, Q. R. Cheng, G. Y. Liao, Z. Q. Pan and H. Zhou, A novel nitrogen heterocyclic ligand-based MOF: synthesis, characterization and photocatalytic properties, *New J. Chem.*, 2019, **43**, 16595-16603.
